# Supplementary material
Source: Springer Nature journal article supplement (https://www.springermedizin.de/resource/supplementary/12913_2013_3397_MOESM3_ESM.pdf/9532720)

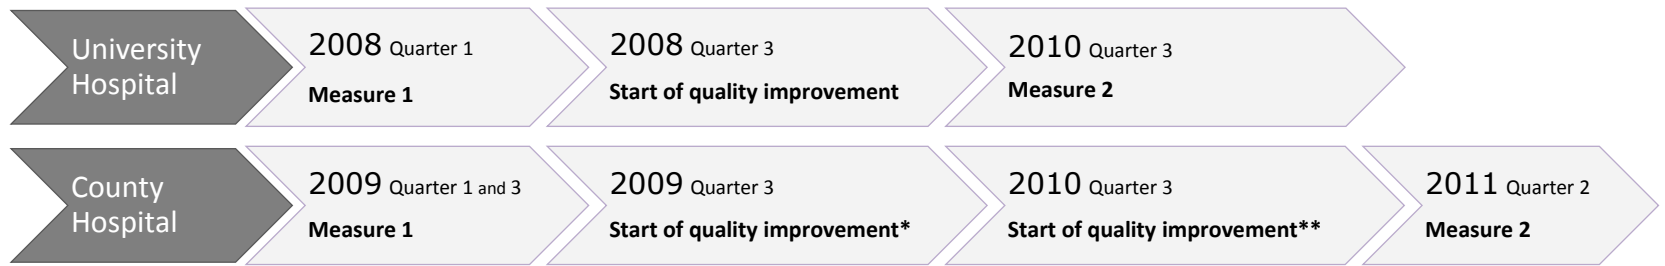

Figure 2.

Supplement: MOESM3 [file 9532720]
